# Supplementary material
Source: ML conference proceedings conference paper supplement (https://openaccess.thecvf.com/content/CVPR2021/html/Kryzhanovskiy_QPP_Real-Time_Quantization_CVPR_2021_paper.html)
Supplement: Supplementary file 1 [file Kryzhanovskiy_QPP_Real-Time_Quantization_CVPR_2021_supplemental.zip]

Archive with 90 entries (80 files):
- 08893-supp/
- __MACOSX/._08893-supp
- 08893-supp/.DS_Store
- __MACOSX/08893-supp/._.DS_Store
- 08893-supp/ResNet_supp_code/
- __MACOSX/08893-supp/._ResNet_supp_code
- 08893-supp/MNIST_TOY_EXAMPLE/
- __MACOSX/08893-supp/._MNIST_TOY_EXAMPLE
- 08893-supp/Supplementary_materials.pdf
- __MACOSX/08893-supp/._Supplementary_materials.pdf
- 08893-supp/ResNet_supp_code/.DS_Store
- __MACOSX/08893-supp/ResNet_supp_code/._.DS_Store
- 08893-supp/ResNet_supp_code/resnet18/
- __MACOSX/08893-supp/ResNet_supp_code/._resnet18
- 08893-supp/ResNet_supp_code/QPP_learn.ipynb
- __MACOSX/08893-supp/ResNet_supp_code/._QPP_learn.ipynb
- 08893-supp/ResNet_supp_code/create_configs.ipynb
- __MACOSX/08893-supp/ResNet_supp_code/._create_configs.ipynb
- 08893-supp/ResNet_supp_code/src/
- __MACOSX/08893-supp/ResNet_supp_code/._src
- 08893-supp/MNIST_TOY_EXAMPLE/MNIST_TOY_EXAMPLE.ipynb
- __MACOSX/08893-supp/MNIST_TOY_EXAMPLE/._MNIST_TOY_EXAMPLE.ipynb
- 08893-supp/ResNet_supp_code/resnet18/statistics/
- __MACOSX/08893-supp/ResNet_supp_code/resnet18/._statistics
- 08893-supp/ResNet_supp_code/resnet18/VALIDATE_DYNAMIC.yaml
- __MACOSX/08893-supp/ResNet_supp_code/resnet18/._VALIDATE_DYNAMIC.yaml
- 08893-supp/ResNet_supp_code/resnet18/.DS_Store
- __MACOSX/08893-supp/ResNet_supp_code/resnet18/._.DS_Store
- 08893-supp/ResNet_supp_code/resnet18/VALIDATE_QPP.yaml
- __MACOSX/08893-supp/ResNet_supp_code/resnet18/._VALIDATE_QPP.yaml
- 08893-supp/ResNet_supp_code/resnet18/VALIDATE_FULL.yaml
- __MACOSX/08893-supp/ResNet_supp_code/resnet18/._VALIDATE_FULL.yaml
- 08893-supp/ResNet_supp_code/resnet18/checkpoints/
- __MACOSX/08893-supp/ResNet_supp_code/resnet18/._checkpoints
- 08893-supp/ResNet_supp_code/resnet18/COLLECT_STATISTICS.yaml
- __MACOSX/08893-supp/ResNet_supp_code/resnet18/._COLLECT_STATISTICS.yaml
- 08893-supp/ResNet_supp_code/resnet18/README
- __MACOSX/08893-supp/ResNet_supp_code/resnet18/._README
- 08893-supp/ResNet_supp_code/resnet18/VALIDATE_STATIC.yaml
- __MACOSX/08893-supp/ResNet_supp_code/resnet18/._VALIDATE_STATIC.yaml
- 08893-supp/ResNet_supp_code/resnet18/Scripts/
- __MACOSX/08893-supp/ResNet_supp_code/resnet18/._Scripts
- 08893-supp/ResNet_supp_code/resnet18/VALIDATE_DEN_SP.yaml
- __MACOSX/08893-supp/ResNet_supp_code/resnet18/._VALIDATE_DEN_SP.yaml
- 08893-supp/ResNet_supp_code/resnet18/VALIDATE_ALL.yaml
- __MACOSX/08893-supp/ResNet_supp_code/resnet18/._VALIDATE_ALL.yaml
- 08893-supp/ResNet_supp_code/src/vgg.py
- __MACOSX/08893-supp/ResNet_supp_code/src/._vgg.py
- 08893-supp/ResNet_supp_code/src/defaultConfigQB.py
- __MACOSX/08893-supp/ResNet_supp_code/src/._defaultConfigQB.py
- 08893-supp/ResNet_supp_code/src/resnet18.py
- __MACOSX/08893-supp/ResNet_supp_code/src/._resnet18.py
- 08893-supp/ResNet_supp_code/src/q_utils.py
- __MACOSX/08893-supp/ResNet_supp_code/src/._q_utils.py
- 08893-supp/ResNet_supp_code/src/q_test.py
- __MACOSX/08893-supp/ResNet_supp_code/src/._q_test.py
- 08893-supp/ResNet_supp_code/src/xnor_util.py
- __MACOSX/08893-supp/ResNet_supp_code/src/._xnor_util.py
- 08893-supp/ResNet_supp_code/src/NewQuantizationBlock.py
- __MACOSX/08893-supp/ResNet_supp_code/src/._NewQuantizationBlock.py
- 08893-supp/ResNet_supp_code/src/q_function.py
- __MACOSX/08893-supp/ResNet_supp_code/src/._q_function.py
- 08893-supp/ResNet_supp_code/src/defaultConfigOneQB.py
- __MACOSX/08893-supp/ResNet_supp_code/src/._defaultConfigOneQB.py
- 08893-supp/ResNet_supp_code/src/.idea/
- __MACOSX/08893-supp/ResNet_supp_code/src/._.idea
- 08893-supp/ResNet_supp_code/resnet18/Scripts/VALIDATE_FULL.sh
- __MACOSX/08893-supp/ResNet_supp_code/resnet18/Scripts/._VALIDATE_FULL.sh
- 08893-supp/ResNet_supp_code/resnet18/Scripts/COLLECT_STATISTICS.sh
- __MACOSX/08893-supp/ResNet_supp_code/resnet18/Scripts/._COLLECT_STATISTICS.sh
- 08893-supp/ResNet_supp_code/resnet18/Scripts/VALIDATE_QPP.sh
- __MACOSX/08893-supp/ResNet_supp_code/resnet18/Scripts/._VALIDATE_QPP.sh
- 08893-supp/ResNet_supp_code/resnet18/Scripts/VALIDATE_DYNAMIC.sh
- __MACOSX/08893-supp/ResNet_supp_code/resnet18/Scripts/._VALIDATE_DYNAMIC.sh
- 08893-supp/ResNet_supp_code/resnet18/Scripts/VALIDATE_STATIC.sh
- __MACOSX/08893-supp/ResNet_supp_code/resnet18/Scripts/._VALIDATE_STATIC.sh
- 08893-supp/ResNet_supp_code/resnet18/Scripts/VALIDATE_DEN_SP.sh
- __MACOSX/08893-supp/ResNet_supp_code/resnet18/Scripts/._VALIDATE_DEN_SP.sh
- 08893-supp/ResNet_supp_code/src/.idea/src.iml
- __MACOSX/08893-supp/ResNet_supp_code/src/.idea/._src.iml
- 08893-supp/ResNet_supp_code/src/.idea/inspectionProfiles/
- __MACOSX/08893-supp/ResNet_supp_code/src/.idea/._inspectionProfiles
- 08893-supp/ResNet_supp_code/src/.idea/workspace.xml
- __MACOSX/08893-supp/ResNet_supp_code/src/.idea/._workspace.xml
- 08893-supp/ResNet_supp_code/src/.idea/modules.xml
- __MACOSX/08893-supp/ResNet_supp_code/src/.idea/._modules.xml
- 08893-supp/ResNet_supp_code/src/.idea/misc.xml
- __MACOSX/08893-supp/ResNet_supp_code/src/.idea/._misc.xml
- 08893-supp/ResNet_supp_code/src/.idea/inspectionProfiles/profiles_settings.xml
- __MACOSX/08893-supp/ResNet_supp_code/src/.idea/inspectionProfiles/._profiles_settings.xml
