# Supplementary material
Source: ML conference proceedings conference paper supplement (https://openaccess.thecvf.com/content/CVPR2021/html/Kryzhanovskiy_QPP_Real-Time_Quantization_CVPR_2021_paper.html)
Supplement: Supplementary file 1 [file Kryzhanovskiy_QPP_Real-Time_Quantization_CVPR_2021_supplemental.zip › 08893-supp/MNIST_TOY_EXAMPLE/MNIST_TOY_EXAMPLE.ipynb]

# %% [code]
#%pylab inline
%matplotlib inline
import numpy as np
import torch
import torch.nn as nn
import torch.nn.functional as F
import torch.utils.data.dataloader as dataloader
import torch.optim as optim
import math
import matplotlib.pyplot as plt
from torch.utils.data import TensorDataset
from torch.autograd import Variable
from torchvision import transforms
from torchvision.datasets import MNIST
from sklearn.linear_model import LinearRegression
from sklearn.isotonic import IsotonicRegression
from sklearn.linear_model import Ridge
from sklearn.preprocessing import PolynomialFeatures
from sklearn.pipeline import make_pipeline
import matplotlib.image as mpimg

import torch.nn.init as init

# %% [markdown]
\begin{equation}
m_l^2 = \frac{1}{2^l\pi}N_1 N_2 \times \dots \times N_l \sigma_{w_1}^2 \sigma_{w_2}^2 \times \dots \times \sigma_{w_l}^2 \sigma_0^2  
\end{equation}

\begin{equation}
\sigma_l^2 = \frac{1}{2^l} (1 - \frac{1}{\pi}) N_1 N_2 \times \dots \times N_l \sigma_{w_1}^2 \sigma_{w_2}^2 \times \dots \times \sigma_{w_l}^2 \sigma_0^2 
\end{equation}

where

$l$ is the number of a layer;

$\sigma_0$ is the standard deviation of the input of the model;

$\sigma_{w_l}$ is the standard deviation of weigths of $l$-th layer;

$N_l$ is the size of input of $l$-th layer;


# %% [code]
import os


# %% [code]
train = MNIST('./data', train=True, download=True, transform=transforms.Compose([
    transforms.ToTensor(), # ToTensor does min-max normalization. 
]), )

test = MNIST('./data', train=False, download=True, transform=transforms.Compose([
    transforms.ToTensor(), # ToTensor does min-max normalization. 
]), )

# Create DataLoader
dataloader_args = dict(shuffle=True, batch_size=64,num_workers=1, pin_memory=True)
train_loader = dataloader.DataLoader(train, **dataloader_args)
test_loader = dataloader.DataLoader(test, **dataloader_args)

dataloader_args_L = dict(shuffle=True, batch_size=10024,num_workers=1, pin_memory=True)
train_loader_L = dataloader.DataLoader(train, **dataloader_args_L)


# %% [code]
train_data = train.train_data
train_data = train.transform(train_data.numpy())
mean_inp = torch.mean(train_data)
print('[Train]')
print(' - Numpy Shape:', train.train_data.cpu().numpy().shape)
print(' - Tensor Shape:', train.train_data.size())
print(' - Transformed Shape:', train_data.size())
print(' - min:', torch.min(train_data))
print(' - max:', torch.max(train_data))
print(' - mean:', torch.mean(train_data))
print(' - std:', torch.std(train_data))
print(' - var:', torch.var(train_data))

# %% [code]
def estimateErrors(model, data, printed_layers):
    Ns = []
    sigmas = []
    means = []
    for fc in model.fcs:
        w = fc.weight.data.cpu().numpy()
        Ns.append(w.shape[-1])
        sigmas.append(w.std())
        means.append(w.mean())
        print(w.shape, w.std(), w.mean())
    
    y_pred = model(data)
    x = model.layers_out[0].cpu().numpy()
    x_std = x.std(axis=1)
    
    A_cur = (1.0 - 1.0/math.pi)
    std_cur = np.copy(x_std)
    stds_est = []
    for i in range(len(sigmas)):
        std_cur *= sigmas[i]
        A_cur *= Ns[i] / 2.0
        stds_est.append( (A_cur ** 0.5) * std_cur)
    stds_real = []
    for lout in model.layers_out[1:]:
        stds_real.append(lout.std(dim=1))
    
    pred_er = []
    pred_std = []
    
    print(x_std.min(), x_std.max(), x_std)
    f, ax = plt.subplots(1, len(printed_layers), figsize=(6,3),dpi=300)
    fontsize = 8
    for index, i in enumerate(printed_layers):
        r = stds_real[i].detach().cpu().numpy()
        
#         ax[index].title("Layer: {}".format(i))
        ax[index].plot(x_std.reshape(-1, 1), r.reshape(-1, 1), 'ko', ms=1, alpha=0.5, label = 'Real')
        ax[index].plot(x_std.reshape(-1, 1), stds_est[i].reshape(-1, 1), label = 'Theoretical Estimation', linewidth = 1.5)
        ax[index].set_title(str(i + 1) + " Layer", fontsize = fontsize)
        
        ax[index].set_xlabel('input variance', fontsize = fontsize )
        if index == 0:
            ax[index].set_ylabel('layer variance', fontsize = fontsize )
        ax[index].legend(fontsize = fontsize)
#         ax[index].figure(figsize=(12, 10));
#         ax[index].show()
        ax[index].tick_params(axis='both', which='major', labelsize=fontsize)
        d = np.abs(stds_est[i] - r)/r
        pred_er.append(d.mean())
        pred_std.append(d.std())
    plt.savefig("./theory_estimation.png", dpi = 300,bbox_inches = 'tight')
    plt.show()
    pred_er = np.array(pred_er) * 100.0
    pred_std = np.array(pred_std) * 100.0
    pred_er = pred_er[:-1]
    pred_std = pred_std[:-1]
    return pred_er, pred_std


# %% [markdown]
## Model

# %% [code]
class Model(nn.Module):
    def __init__(self, L):
        super(Model, self).__init__()
        self.input_size = 784
        self.output_size = 784
        N = 256 * (L-1) + self.output_size
        self.fcs = []
        self.learning_variables = []
        
        N_in = self.input_size
        for i in range(L):
            N_out = N - 256 * i
            print(N_in, N_out)
            layer = nn.Linear(N_in, N_out, bias=False)
            layer.cuda()
            self.fcs.append(layer)
            self.learning_variables.append(layer.weight)
            N_in = N_out
    def reset_params(self, init_func):
        print(init_func)
        for m in self.fcs:
            if init_func in ["msra", "kaiming_uniform"]:
                init.kaiming_uniform_(m.weight, mode='fan_out', nonlinearity='relu') #.data

            elif init_func == "kaiming_normal":
                init.kaiming_normal_(m.weight, mode='fan_in', nonlinearity='relu') # mode='fan_out' /fan_in)

            elif init_func == "xavier_uniform":
                init.xavier_uniform_(m.weight)

            elif init_func == "xavier_normal":
                init.xavier_normal_(m.weight)    

            elif init_func == "orthogonal":
                init.orthogonal_(m.weight) #.data   
            else:
                raise ValueError("Not supported init!\n")
                
    def forward(self, x):
        x = x.view((-1, 784)) #[b, c*h*w]
        m =  x.mean(dim=1).unsqueeze(dim=1)
        x = x - m
        self.layers_out = [x]
        for i in range(len(self.fcs)):
            x = self.fcs[i](x)
            x = F.relu(x)
            self.layers_out.append(x)
        
        return x

model = Model(L=10)
model.reset_params("xavier_normal")
model.cuda() # CUDA!
optimizer = optim.Adam(model.learning_variables, lr=0.001)#(model.parameters(), lr=0.001)
BCnt = 1
datas = []
for batch_idx, (data, target) in enumerate(train_loader_L):
    # Get Samples
    data, target = Variable(data.cuda()), Variable(target.cuda())
    datas.append(data)
    BCnt -= 1
    if BCnt <= 0:
        break


# %% [code]
printed_layers = [3,8]
pred_er0, pred_std0 = estimateErrors(model, datas[0],printed_layers)

# %% [markdown]
## Train

# %% [code]
model.train()
start_train = 1
losses = []
printed_layers = [3,7]
if start_train > 0:
    for epoch in range(20):
        for batch_idx, (data, target) in enumerate(train_loader):
            # Get Samples
            target = Variable(data.cuda())
            data = target + torch.randn(data.shape, device=torch.device('cuda')) * 0.1
            target = Variable(target.view((-1, 784)))
            #print(data.shape)

            # Init
            optimizer.zero_grad()

            # Predict
            y_pred = model(data) 

            # Calculate loss
            loss = F.l1_loss(y_pred, target)
            #print(loss.data.item())
            losses.append(loss.data.item())
            # Backpropagation
            loss.backward()
            optimizer.step()


            # Display
            if batch_idx % 100 == 1:
                print('\r Train Epoch: {} [{}/{} ({:.0f}%)]\tLoss: {:.6f}'.format(
                    epoch, 
                    batch_idx * len(data), 
                    len(train_loader.dataset),
                    100. * batch_idx / len(train_loader), 
                    loss.data.item()), 
                    end='')

        print()

#plot(losses)
pred_er1, pred_std1 = estimateErrors(model, datas[0], printed_layers)

# %% [markdown]
## Evaluate

# %% [code]
num = 7
for num in range(20):
    x = evaluate_x[num]
    o = output[num]#.detach().cpu().numpy()
    l = evaluate_y[num]#.detach().cpu().numpy()
    print('Input')
    plt.imshow(x)
    plt.show()
    print('Output')
    plt.imshow(o)
    plt.show()
    print('GT')
    plt.imshow(l)
    plt.show()

# %% [markdown]
# Prediction Error

# %% [code]
plt.figure(figsize=(16, 6));
x = np.arange(len(pred_er0))

plt.plot(x, pred_er0, label='Before Training', color='#3F7F4C')
plt.fill_between(x, pred_er0-pred_std0, pred_er0+pred_std0, alpha=0.3, edgecolor='#3F7F4C', facecolor='#7EFF99')

plt.plot(x, pred_er1, label='After Training', color='#CC4F1B')
plt.fill_between(x, pred_er1-pred_std1, pred_er1+pred_std1, alpha=0.3, edgecolor='#CC4F1B', facecolor='#FF9848')


plt.title('Estimation errors') 
plt.xlabel('Layers');
plt.ylabel('Mean errror, %');
# plt.ylim(0, 350.0)
#plt.xlim(0, x[-2])
plt.legend(loc='upper right');
plt.show() 

# %% [markdown]
# Train QPP

# %% [code]


def trainQPP(model, data, printed_layers):
    y_pred = model(data)
    x = model.layers_out[0].cpu().numpy()
    x_std = x.std(axis=1)
    print(x_std.min(), x_std.max(), x_std)
    qpp_er = []
    qpp_std = []
    
    
    
    
    Ns = []
    sigmas = []
    means = []
    for fc in model.fcs:
        w = fc.weight.data.cpu().numpy()
        Ns.append(w.shape[-1])
        sigmas.append(w.std())
        means.append(w.mean())
        print(w.shape, w.std(), w.mean())
    
#     y_pred = model(data)
#     x = model.layers_out[0].cpu().numpy()
#     x_std = x.std(axis=1)
    
    A_cur = (1.0 - 1.0/math.pi)
    std_cur = np.copy(x_std)
    stds_est = []
    for i in range(len(sigmas)):
        std_cur *= sigmas[i]
        A_cur *= Ns[i] / 2.0
        stds_est.append( (A_cur ** 0.5) * std_cur)
    stds_real = []
    for lout in model.layers_out[1:]:
        stds_real.append(lout.std(dim=1))
    
    pred_er = []
    pred_std = []
    
    print(x_std.min(), x_std.max(), x_std)
    f, ax = plt.subplots(1, len(printed_layers), figsize=(6,3),dpi=300)
    fontsize = 8
    index = -1

    for i, lout in enumerate(model.layers_out[1:]):
        print(lout.shape)
        if i not in printed_layers:
            continue
        index += 1
        r = lout.std(dim=1).detach().cpu().numpy()
         
        pred = None
        regressor = LinearRegression()
        
        regressor.fit(x_std.reshape(-1, 1), r.reshape(-1, 1))
        pred = regressor.predict(x_std.reshape(-1, 1))[:, 0]
        
        
        r = stds_real[i].detach().cpu().numpy()
        
#         ax[index].title("Layer: {}".format(i))

        
        ax[index].plot(x_std.reshape(-1, 1), stds_est[i].reshape(-1, 1), label = 'Theoretical Estimation', linewidth = 1.5)        
        ax[index].plot(x_std.reshape(-1, 1), r.reshape(-1, 1), 'ko', ms=1, alpha=0.5, label = 'Real')
        ax[index].plot(x_std.reshape(-1, 1), pred.reshape(-1, 1), color = 'C3', linestyle = ':', label = 'LS Estimation', linewidth = 1.5)

#         ax[index].plot(x_std.reshape(-1,1), )
        ax[index].set_title(str(i+1) + " Layer", fontsize = fontsize)
        ax[index].set_xlabel('input variance', fontsize = fontsize )
        if index == 0:
            ax[index].set_ylabel('layer variance', fontsize = fontsize )
        ax[index].legend(fontsize = 6)
#         ax[index].figure(figsize=(12, 10));
#         ax[index].show()
        ax[index].tick_params(axis='both', which='major', labelsize=fontsize)
        
        
        d = np.abs(pred - r)/r
        qpp_er.append(d.mean())
        qpp_std.append(d.std())
    plt.savefig("./theory_estimation_qpp.png", dpi = 300,bbox_inches = 'tight')
    plt.show()
    qpp_er = np.array(qpp_er) * 100.0
    qpp_std = np.array(qpp_std) * 100.0
    qpp_er = qpp_er[:-1]
    qpp_std = qpp_std[:-1]
    return qpp_er, qpp_std


printed_layers = [3,8]
qpp_er, qpp_std = trainQPP(model, datas[0], printed_layers)
# pred_er1, pred_std1 = estimateErrors(model, datas[0], printed_layers)

# pred_er1,pred_std1

# %% [code]
plt.figure(figsize=(10, 6));
x = np.arange(len(pred_er0))

plt.plot(x, pred_er0, label='Formula (Before Training)', color='#3F7F4C')
plt.fill_between(x, pred_er0-pred_std0, pred_er0+pred_std0, alpha=0.3, edgecolor='#3F7F4C', facecolor='#7EFF99')

plt.plot(x, pred_er1, label='Formula (After Training)', color='#CC4F1B')
plt.fill_between(x, pred_er1-pred_std1, pred_er1+pred_std1, alpha=0.2, edgecolor='#CC4F1B', facecolor='#FF9848')

plt.plot(x, qpp_er, label='QPP', color='#0000ff')
plt.fill_between(x, qpp_er-qpp_std, qpp_er+qpp_std, alpha=0.3, edgecolor='#6666ff', facecolor='#ccccff')

#plt.plot(x, qpp_er, label='QPP', color='#3F7F4C
#plt.fill_between(x, qpp_er-qpp_std, qpp_er+qpp_std, alpha=0.3, edgecolor='#3F7F4C', facecolor='#7EFF99')


plt.title('Estimation errors') 
plt.xlabel('Layers');
plt.ylabel('Mean errror, %');
plt.ylim(0, 100.0)
#plt.xlim(0, x[-2])
plt.legend(loc='upper right');
plt.show() 

# %% [code]
def trainQPPMultiple(model, data, k=0):
    y_pred = model(data)
    x = model.layers_out[k].detach().cpu().numpy()
    x_std = x.std(axis=1)
    x_2 = np.power(x, 2.0).mean(axis=1)
    x_abs = np.abs(x).mean(axis=1)
    x_qs = np.quantile(x, [0.99, 0.999, 0.9999], axis=1)
    x_max = np.max(x, axis=1)
    x_min = np.min(x, axis=1)
    dif = x - np.expand_dims(x.mean(axis=1), axis=1)
    d1 = np.abs(dif).mean(axis=1)
    d3 = np.power(dif, 3).mean(axis=1)
    d4 = np.power(dif, 4).mean(axis=1)
    d5 = np.power(dif, 5).mean(axis=1)
    f = np.vstack((x_std, x_2, x_abs, x_min, x_max, x_qs, d1, d3, d4, d5)).transpose((1, 0))
        
    
    qpp_er = []
    qpp_std = []
    
    for i, lout in enumerate(model.layers_out[(k+1):]):
        print(lout.shape)
        r = lout.std(dim=1).detach().cpu().numpy()
           
        pred = None
        regressor = LinearRegression()
        
        regressor.fit(f, r.reshape(-1, 1))
        pred = regressor.predict(f)[:, 0]
        print('min: {}\tmean: {}\tmax:{}'.format(r.min(), r.mean(), r.max()))
        plt.title("Layer: {} (shape: {})".format(i, lout.shape))
        plt.plot(x_std.reshape(-1, 1), pred.reshape(-1, 1), 'ro', ms=3, alpha=0.05)
        plt.plot(x_std.reshape(-1, 1), r.reshape(-1, 1), 'ko', ms=3, alpha=0.05)
        plt.xlabel('std(x)')
        plt.ylabel('layer_std')
        plt.figure(figsize=(12, 10));
        plt.show()
        
        d = np.abs(pred - r)/r
        qpp_er.append(d.mean())
        qpp_std.append(d.std())
    
    
    qpp_er = np.array(qpp_er) * 100.0
    qpp_std = np.array(qpp_std) * 100.0
    qpp_er = qpp_er[:-1]
    qpp_std = qpp_std[:-1]
    return qpp_er, qpp_std

k=1
qppM_er, qppM_std = trainQPPMultiple(model, datas[0], k)

plt.figure(figsize=(16, 6));
x = np.arange(len(pred_er0))

xm = np.arange(len(qppM_er))+k
plt.plot(xm, qppM_er, label='QPPM', color='#CC4F1B')
plt.fill_between(xm, qppM_er-qppM_std, qppM_er+qppM_std, alpha=0.3, edgecolor='#CC4F1B', facecolor='#FF9848')

plt.plot(x, qpp_er, label='QPP', color='#3F7F4C')
plt.fill_between(x, qpp_er-qpp_std, qpp_er+qpp_std, alpha=0.3, edgecolor='#3F7F4C', facecolor='#7EFF99')


plt.title('Estimation errors') 
plt.xlabel('Layers');
plt.ylabel('Mean errror, %');
#plt.ylim(0, 800)
#plt.xlim(0, x[-2])
plt.legend(loc='upper right');
plt.show() 

# %% [code]
def trainQPPPolynomial(model, data, k=0):
    
    y_pred = model(data)
    x = model.layers_out[k].detach().cpu().numpy()
    x_std = x.std(axis=1)
    x_2 = np.power(x, 2.0).mean(axis=1)
    x_abs = np.abs(x).mean(axis=1)
    x_qs = np.quantile(x, [0.99, 0.999, 0.9999], axis=1)
    x_max = np.max(x, axis=1)
    x_min = np.min(x, axis=1)
    dif = x - np.expand_dims(x.mean(axis=1), axis=1)
    d1 = np.abs(dif).mean(axis=1)
    d3 = np.power(dif, 3).mean(axis=1)
    d4 = np.power(dif, 4).mean(axis=1)
    d5 = np.power(dif, 5).mean(axis=1)
    f = np.vstack((x_std, x_2, x_abs, x_min, x_max, x_qs, d1, d3, d4, d5)).transpose((1, 0))
    
        
    
    qpp_er = []
    qpp_std = []
    
    for i, lout in enumerate(model.layers_out[(k+1):]):
        print(lout.shape)
        r = lout.std(dim=1).detach().cpu().numpy()
        
        
        
        pred = None
        regressor =  make_pipeline(PolynomialFeatures(5), Ridge())
        
        regressor.fit(f, r.reshape(-1, 1))
        pred = regressor.predict(f)[:, 0]
        
        plt.title("Layer: {} (shape: {})".format(i, lout.shape))
        plt.plot(x_std.reshape(-1, 1), pred.reshape(-1, 1), 'ro', ms=3, alpha=0.05)
        plt.plot(x_std.reshape(-1, 1), r.reshape(-1, 1), 'ko', ms=3, alpha=0.05)
        plt.xlabel('std(x)')
        plt.ylabel('layer_std')
        plt.figure(figsize=(12, 10));
        plt.show()
        
        d = np.abs(pred - r)/r
        qpp_er.append(d.mean())
        qpp_std.append(d.std())
    
    
    qpp_er = np.array(qpp_er) * 100.0
    qpp_std = np.array(qpp_std) * 100.0
    qpp_er = qpp_er[:-1]
    qpp_std = qpp_std[:-1]
    return qpp_er, qpp_std

qppI_er, qppI_std = trainQPPPolynomial(model, datas[0], k=0)


# %% [code]
plt.figure(figsize=(16, 6));
x = np.arange(len(pred_er0))

plt.plot(x, qppI_er, label='QPP_polinom', color='#CC4F1B')
plt.fill_between(x, qppI_er-qppI_std, qppI_er+qppI_std, alpha=0.3, edgecolor='#CC4F1B', facecolor='#FF9848')

plt.plot(x, qpp_er, label='QPP', color='#3F7F4C')
plt.fill_between(x, qpp_er-qpp_std, qpp_er+qpp_std, alpha=0.3, edgecolor='#3F7F4C', facecolor='#7EFF99')


plt.title('Estimation errors') 
plt.xlabel('Layers');
plt.ylabel('Mean errror, %');
#plt.ylim(0, 350.0)
#plt.xlim(0, x[-2])
plt.legend(loc='upper right');
plt.show() 

# %% [code]
def trainQPPShow(model, data, L):
    y_pred = model(data)
    x = model.layers_out[0].cpu().numpy()
    x_std = x.std(axis=1)
    x_2 = np.power(x, 2.0).mean(axis=1)
    x_abs = np.abs(x).mean(axis=1)
    x_qs = np.quantile(x, [0.99, 0.999, 0.9999], axis=1)
    x_max = np.max(x, axis=1)
    x_min = np.min(x, axis=1)
    f = np.vstack((x_std, x_2, x_abs, x_min, x_max, x_qs)).transpose((1, 0))
        
    
    
    for i, lout in enumerate(model.layers_out[1:]):
        if i != L:
            continue
        print(lout.shape)
        r = lout.std(dim=1).detach().cpu().numpy()
        
        r_m = r.mean()
        pred = None
        regressor = LinearRegression()
        
        regressor.fit(f, r.reshape(-1, 1))
        pred = regressor.predict(f)[:, 0]
        
        plt.title("Layer: {} (shape: {})".format(i, lout.shape))
        plt.plot(x_std.reshape(-1, 1), pred.reshape(-1, 1), 'ro', ms=3, alpha=0.05)
        plt.plot(x_std.reshape(-1, 1), r.reshape(-1, 1), 'ko', ms=3, alpha=0.05)
        plt.hlines(r_m, x_std.min(), x_std.max())
        plt.xlabel('std(x)')
        plt.ylabel('layer_std')
        plt.figure(figsize=(12, 10));
        plt.show()
        
        plt.title("Layer: {} (shape: {})".format(i, lout.shape))
        plt.plot(x_2.reshape(-1, 1), pred.reshape(-1, 1), 'ro', ms=3, alpha=0.05)
        plt.plot(x_2.reshape(-1, 1), r.reshape(-1, 1), 'ko', ms=3, alpha=0.05)
        plt.hlines(r_m, x_2.min(), x_2.max())
        plt.xlabel('x_2')
        plt.ylabel('layer_std')
        plt.figure(figsize=(12, 10));
        plt.show()
        
        plt.title("Layer: {} (shape: {})".format(i, lout.shape))
        plt.plot(x_qs[1].reshape(-1, 1), pred.reshape(-1, 1), 'ro', ms=3, alpha=0.05)
        plt.plot(x_qs[1].reshape(-1, 1), r.reshape(-1, 1), 'ko', ms=3, alpha=0.05)
        plt.hlines(r_m, x_qs[1].min(), x_qs[1].max())
        plt.xlabel('q=0.999')
        plt.ylabel('layer_std')
        plt.figure(figsize=(12, 10));
        plt.show()
        


trainQPPShow(model, datas[0], L=6)

# %% [code]


# %% [code]
def accuracy_full(output, target, topk=(1,)):
    """Computes the accuracy over the k top predictions for the specified values of k"""
    with torch.no_grad():
        maxk = max(topk)
        batch_size = target.size(0)

        _, pred = output.topk(maxk, 1, True, True)
        pred = pred.t()
        print(pred)
        _, pred_full = target.topk(1, 1, True, True)
        pred_full = pred_full.t()[0]
        print(pred_full.shape)
        correct = pred.eq(pred_full)
        print(correct)
        res = []
        for k in topk:
            correct_k = correct[:k].view(-1).float().sum(0, keepdim=True)
            res.append(correct_k.mul_(100.0 / batch_size))
        return res


# %% [code]
x = torch.tensor([[0.1, 0.7, 0 ,0.5,0.6],
                 [1., 0, 0 ,1.5,0.6],
                [1., 0, 0 ,1.5,0.6]])
y = torch.tensor([[1., 0, 0 ,0.5,0.6],
                 [1., 0, 0 ,1.6,0.5],
                [1., 0, 0 ,1.5,1.6]])


# %% [code]
accuracy_full(x,y,(1,2))

# %% [code]


# %% [code]
