# Supplementary material
Source: ML conference proceedings conference paper supplement (https://openaccess.thecvf.com/content/CVPR2021/html/Kryzhanovskiy_QPP_Real-Time_Quantization_CVPR_2021_paper.html)
Supplement: Supplementary file 1 [file Kryzhanovskiy_QPP_Real-Time_Quantization_CVPR_2021_supplemental.zip › 08893-supp/ResNet_supp_code/create_configs.ipynb]

# %% [code]
import numpy as np
import os

# %% [markdown]
# Creation of QPP configs 

# %% [markdown]
## input and output base path: dir_source/dir_checkpoint_name

# %% [code]
# create directory for experiments fo rchosen checpoint (checkpoint name = directory name)
source_path = '/home/balitskiy/projects/ResNet18_cl'
checkpoint_name = 'resnet34'
input_base_path = os.path.join(source_path, checkpoint_name)
output_base_path = os.path.join(source_path, checkpoint_name)
collect = 'true'

if not os.path.exists(input_base_path):
    os.mkdir(input_base_path)
if not os.path.exists(output_base_path):
    os.mkdir(output_base_path)


# %% [code]
# flag collect - enable statistics collection for all QPP configs 
if collect == 'true':
    operation = 'collect_statistics'
    device = 0
    EXP_NAME = 'COLLECT'
    STATISTICS_PATH = 'statistics/'
    UP_THRESHOLDS_PATH = 'up_thresholds/'
    LOW_THRESHOLDS_PATH = 'low_tresholds/'
    UP_QUANTILES = quantiles
    LOW_QUANTILES = quantiles
    MEAN = 'true'
    STD = 'true'
    MAX = 'true'
    MIN = 'true'
    ABS_MAX = 'true'

# %% [markdown]
# dynamic qblocks

# %% [code]
#considered quantiles 
quantiles_9_99 = np.linspace(0.9,0.98,9)
quantiles_99_999 = np.linspace(0.95,0.98,7)
quantiles_998_999 = np.linspace(0.98,0.989,10)
qunatiles_la = np.linspace(0.99,0.998,9)
quantiles_999_9999 = np.linspace(0.999,0.9999,10)
quantiles_9999_99999 = np.linspace(0.9999,0.99999,10)
quantiles_99999_1 = np.linspace(0.99999,1,11)
quantiles = np.hstack((quantiles_9_99,quantiles_99_999,quantiles_998_999,qunatiles_la,quantiles_999_9999,quantiles_9999_99999,quantiles_99999_1))
quantiles = np.round(quantiles,6)
quantiles

# %% [code]
operation = 'validate'
device = 0
EXP_NAME = 'DYNAMIC'


# %% [code]
if not os.path.exists(os.path.join(input_base_path,'qblocks_configs/')):
    os.mkdir(os.path.join(input_base_path,'qblocks_configs/'))

if not os.path.exists(os.path.join(input_base_path,'qblocks_configs/DYNAMIC/')):
    os.mkdir(os.path.join(input_base_path,'qblocks_configs/DYNAMIC/'))
    
    

# %% [code]
# quantiles = [0.9]
if not os.path.exists(os.path.join(input_base_path,'qblocks_configs/')):
    os.mkdir(os.path.join(input_base_path,'qblocks_configs/'))
    
for up_q in quantiles:
    for low_q in quantiles:

        EXP_NAME_CUS =EXP_NAME  + '_' + str(up_q)[2:] + '_' + str(low_q)[2:] 
        filename = EXP_NAME  + '_' + str(up_q)[2:] + '_' + str(low_q)[2:] + '.yaml'
        config = 'OPERATION: \'{}\' \nOUTPUT_BASE_PATH: \'{}\' \nINPUT_BASE_PATH: \'{}\' \nDEVICE: {} \nEXP_NAME: \'{}\' \n' \
        'DYNAMIC: \n  APPLY: true \n  UP_QUANTILE: {} \n  LOW_QUANTILE: {}\nCOLLECT:\n  APPLY: {}'.format(operation, 
                                                                                                  output_base_path,
                                                                                                  input_base_path,
                                                                                                  device,
                                                                                                  EXP_NAME_CUS,
                                                                                                  up_q,
                                                                                                  low_q,
                                                                                                  collect)
        if collect == 'true':
             
            STATISTICS_PATH_T  = STATISTICS_PATH +  EXP_NAME  + '_' + str(up_q)[2:] + '_' + str(low_q)[2:]
            UP_THRESHOLDS_PATH_T = UP_THRESHOLDS_PATH  + EXP_NAME  + '_' + str(up_q)[2:] + '_' + str(low_q)[2:]
            LOW_THRESHOLDS_PATH_T = LOW_THRESHOLDS_PATH +  EXP_NAME  + '_' + str(up_q)[2:] + '_' + str(low_q)[2:]
            config += '\n  STATISTICS_PATH: {} \n  UP_THRESHOLDS_PATH: {} \n  LOW_THRESHOLDS_PATH: {} \n  MEAN: {} \n  STD: {} \n' \
                        '  MAX: {} \n  MIN: {} \n  ABS_MAX: {} \n'.format(STATISTICS_PATH_T,
                                                                         UP_THRESHOLDS_PATH_T,
                                                                         LOW_THRESHOLDS_PATH_T,
                                                                         MEAN,
                                                                         STD,
                                                                         MAX,
                                                                         MIN,
                                                                         ABS_MAX)

            config += '  UP_QUANTILES: \n'
            for quan in quantiles:
                config += '    - {} \n'.format(quan)


            config += '  LOW_QUANTILES: \n'
            for quan in quantiles:
                config += '    - {} \n'.format(quan)
            filename =filename[:-5] + '_collect' + '.yaml'

        
        fp = open(os.path.join(input_base_path,'qblocks_configs/DYNAMIC/',filename),'w')
        fp.write(config)
        fp.close()
    

# %% [markdown]
# Collect statistics qblock

# %% [code]
# collected quantiles 
quantiles_9_99 = np.linspace(0.9,0.98,9)
quantiles_99_999 = np.linspace(0.95,0.98,7)
quantiles_998_999 = np.linspace(0.98,0.989,10)
qunatiles_la = np.linspace(0.99,0.998,9)
quantiles_999_9999 = np.linspace(0.999,0.9999,10)
quantiles_9999_99999 = np.linspace(0.9999,0.99999,10)
quantiles_99999_1 = np.linspace(0.99999,1,11)
quantiles = np.hstack((quantiles_9_99,quantiles_99_999,quantiles_998_999,qunatiles_la,quantiles_999_9999,quantiles_9999_99999,quantiles_99999_1))
quantiles = np.round(quantiles,6)
quantiles

# %% [code]
operation = 'collect_statistics'
device = 0
EXP_NAME = 'COLLECT'
STATISTICS_PATH = 'statistics/statistics'
UP_THRESHOLDS_PATH = 'up_thresholds/FULL/'
LOW_THRESHOLDS_PATH = 'low_tresholds/FULL/'
UP_QUANTILES = quantiles
LOW_QUANTILES = quantiles

# collection of other statistics 
MEAN = 'true'
STD = 'true'
MAX = 'true'
MIN = 'true'
ABS_MAX = 'true'

# %% [code]
if not os.path.exists(os.path.join(input_base_path,'qblocks_configs/')):
    os.mkdir(os.path.join(input_base_path,'qblocks_configs/'))

if not os.path.exists(os.path.join(input_base_path,'qblocks_configs/COLLECT/')):
    os.mkdir(os.path.join(input_base_path,'qblocks_configs/COLLECT/'))
    
    

# %% [code]
if not os.path.exists(os.path.join(input_base_path,'statistics/')):
    os.mkdir(os.path.join(input_base_path,'statistics/'))

# %% [code]

filename = EXP_NAME + '.yaml'

config = 'OPERATION: \'{}\' \nOUTPUT_BASE_PATH: \'{}\' \nINPUT_BASE_PATH: \'{}\' \nDEVICE: {} '\
'\nEXP_NAME: \'{}\' \nCOLLECT:\n'.format(operation, 
                                              output_base_path,
                                              input_base_path,
                                              device,
                                              EXP_NAME)


config += '  APPLY: true \n  STATISTICS_PATH: {} \n  UP_THRESHOLDS_PATH: {} \n  LOW_THRESHOLDS_PATH: {} \n  MEAN: {} \n  STD: {} \n' \
'  MAX: {} \n  MIN: {} \n  ABS_MAX: {} \n'.format(STATISTICS_PATH,
                                                 UP_THRESHOLDS_PATH,
                                                 LOW_THRESHOLDS_PATH,
                                                 MEAN,
                                                 STD,
                                                 MAX,
                                                 MIN,
                                                 ABS_MAX)

config += '  UP_QUANTILES: \n'
for quan in quantiles:
    config += '    - {} \n'.format(quan)

    
config += '  LOW_QUANTILES: \n'
for quan in quantiles:
    config += '    - {} \n'.format(quan)

    
fp = open(os.path.join(input_base_path,'qblocks_configs/COLLECT/', filename),'w')
fp.write(config)
fp.close()

# %% [markdown]

# STATIC QBLOCK

# %% [code]
operation = 'validate'
device = 0
EXP_NAME = 'STATIC'
ALL_UP_THRESHOLDS_PATH = 'up_thresholds/FULL/'
ALL_LOW_THRESHOLDS_PATH = 'low_tresholds/FULL/'


# %% [code]
if not os.path.exists(os.path.join(input_base_path,'qblocks_configs/')):
    os.mkdir(os.path.join(input_base_path,'qblocks_configs/'))

if not os.path.exists(os.path.join(input_base_path,'qblocks_configs/STATIC/')):
    os.mkdir(os.path.join(input_base_path,'qblocks_configs/STATIC/'))
    

# %% [code]


# %% [code]
up_threshold_dir_full = os.path.join(output_base_path, ALL_UP_THRESHOLDS_PATH)
low_threshold_dir_full = os.path.join(output_base_path, ALL_LOW_THRESHOLDS_PATH)


dirnames_up = [f for f in os.listdir(up_threshold_dir_full) if os.path.isdir(os.path.join(up_threshold_dir_full, f))]
dirnames_low = [f for f in os.listdir(low_threshold_dir_full) if os.path.isdir(os.path.join(low_threshold_dir_full, f))]

# %% [code]
config = 'OPERATION: \'{}\' \nOUTPUT_BASE_PATH: \'{}\' \nINPUT_BASE_PATH: \'{}\' \nDEVICE: {} '\
'\nEXP_NAME: \'{}\' \nSTATIC:\n'.format(operation, 
                                              output_base_path,
                                              input_base_path,
                                              device,
                                              EXP_NAME)


for dir_up in dirnames_up:
    for dir_low in dirnames_low:
        t_config = config + '  APPLY: true \n  UP_THRESHOLDS_PATH: {} \n  LOW_THRESHOLDS_PATH: {} \nCOLLECT:\n  APPLY: {}'.format(
            os.path.join(ALL_UP_THRESHOLDS_PATH,dir_up),
            os.path.join(ALL_LOW_THRESHOLDS_PATH,dir_low),collect )
        filename = EXP_NAME  + '_' + dir_up[:dir_up.find('_')] + '_' +  dir_low[:dir_low.find('_')] + '.yaml'
        if collect == 'true':
             
            STATISTICS_PATH_T  = STATISTICS_PATH +  EXP_NAME  + '_' + str(up_q)[2:] + '_' + str(low_q)[2:]
            
            config += '\n  STATISTICS_PATH: {} \n  UP_THRESHOLDS_PATH: {} \n  LOW_THRESHOLDS_PATH: {} \n  MEAN: {} \n  STD: {} \n' \
                        '  MAX: {} \n  MIN: {} \n  ABS_MAX: {} \n'.format(STATISTICS_PATH_T,
                                                                         UP_THRESHOLDS_PATH,
                                                                         LOW_THRESHOLDS_PATH,
                                                                         MEAN,
                                                                         STD,
                                                                         MAX,
                                                                         MIN,
                                                                         ABS_MAX)

            config += '  UP_QUANTILES: \n'
            for quan in quantiles:
                config += '    - {} \n'.format(quan)


            config += '  LOW_QUANTILES: \n'
            for quan in quantiles:
                config += '    - {} \n'.format(quan)
        


            filename = EXP_NAME  + '_' + dir_up[:dir_up.find('_')] + '_' +  dir_low[:dir_low.find('_')] + '.yaml'
            filename =filename[:-5] + '_collect' + '.yaml' 
            
        fp = open(os.path.join(input_base_path,'qblocks_configs/STATIC/',filename),'w')
        fp.write(t_config)
        fp.close()
       

# %% [markdown]
# QPP QBLOCK

# %% [code]
operation = 'validate'
device = 0
collect = 'false'
EXP_NAME = 'QPP'
ALL_UP_PREDICTORS_PATH = 'up_predictors/statistics/'
ALL_LOW_PREDICTORS_PATH = 'low_predictors/statistics/'

if not os.path.exists(os.path.join(input_base_path,'qblocks_configs/')):
    os.mkdir(os.path.join(input_base_path,'qblocks_configs/'))

if not os.path.exists(os.path.join(input_base_path,'qblocks_configs/QPP/')):
    os.mkdir(os.path.join(input_base_path,'qblocks_configs/QPP/'))
    
up_predictors_dir_full = os.path.join(output_base_path, ALL_UP_PREDICTORS_PATH)
low_predictors_dir_full = os.path.join(output_base_path, ALL_LOW_PREDICTORS_PATH)


if not os.path.exists(os.path.join(up_predictors_dir_full)):
    os.mkdir(os.path.join(up_predictors_dir_full))

if not os.path.exists(os.path.join(low_predictors_dir_full)):
    os.mkdir(os.path.join(low_predictors_dir_full))


dirnames_up = [f for f in os.listdir(up_predictors_dir_full) if os.path.isdir(os.path.join(up_predictors_dir_full, f))]
dirnames_low = [f for f in os.listdir(low_predictors_dir_full) if os.path.isdir(os.path.join(low_predictors_dir_full, f))]

len(dirnames_up), dirnames_low

# %% [code]
config = 'OPERATION: \'{}\' \nOUTPUT_BASE_PATH: \'{}\' \nINPUT_BASE_PATH: \'{}\' \nDEVICE: {} '\
'\nEXP_NAME: \'{}\' \nQPP:\n'.format(operation, 
                                              output_base_path,
                                              input_base_path,
                                              device,
                                              EXP_NAME)


for dir_up in dirnames_up:
    for dir_low in dirnames_low:
        t_config = config + '  APPLY: true \n  UP_PREDICTORS_PATH: {} \n  LOW_PREDICTORS_PATH: {} \nCOLLECT:\n  APPLY: {}'.format(
            os.path.join(ALL_UP_PREDICTORS_PATH,dir_up),
            os.path.join(ALL_LOW_PREDICTORS_PATH,dir_low),collect )
        
        filename = EXP_NAME +  '_' + dir_up + '_' +  dir_low  + '.yaml'
        if collect == 'true':
             
            STATISTICS_PATH_T  = STATISTICS_PATH +  EXP_NAME  + '_' + str(up_q)[2:] + '_' + str(low_q)[2:]
            UP_THRESHOLDS_PATH_T = UP_THRESHOLDS_PATH  + EXP_NAME  + '_' + str(up_q)[2:] + '_' + str(low_q)[2:]
            LOW_THRESHOLDS_PATH_T = LOW_THRESHOLDS_PATH +  EXP_NAME  + '_' + str(up_q)[2:] + '_' + str(low_q)[2:]
            t_config += '\n  STATISTICS_PATH: {} \n  UP_THRESHOLDS_PATH: {} \n  LOW_THRESHOLDS_PATH: {} \n  MEAN: {} \n  STD: {} \n' \
                        '  MAX: {} \n  MIN: {} \n  ABS_MAX: {} \n'.format(STATISTICS_PATH_T,
                                                                         UP_THRESHOLDS_PATH_T,
                                                                         LOW_THRESHOLDS_PATH_T,
                                                                         MEAN,
                                                                         STD,
                                                                         MAX,
                                                                         MIN,
                                                                         ABS_MAX)

            t_config += '  UP_QUANTILES: \n'
            for quan in quantiles:
                t_config += '    - {} \n'.format(quan)


            t_config += '  LOW_QUANTILES: \n'
            for quan in quantiles:
                t_config += '    - {} \n'.format(quan)

            filename =filename[:-5] + '_collect' + '.yaml'
        
        fp = open(os.path.join(input_base_path,'qblocks_configs/QPP/',filename),'w')
        fp.write(t_config)
        fp.close()

# %% [markdown]
## FULL MODEL CONFIG 


# %% [code]

operation = 'validate'
device = 0
EXP_NAME = 'FULL'
APPLY_FULL = 'true'


# %% [code]
if not os.path.exists(os.path.join(input_base_path,'qblocks_configs/')):
    os.mkdir(os.path.join(input_base_path,'qblocks_configs/'))

if not os.path.exists(os.path.join(input_base_path,'qblocks_configs/FULL/')):
    os.mkdir(os.path.join(input_base_path,'qblocks_configs/FULL/'))

# %% [code]
config = 'OPERATION: \'{}\' \nOUTPUT_BASE_PATH: \'{}\' \nINPUT_BASE_PATH: \'{}\' \nDEVICE: {} '\
'\nEXP_NAME: \'{}\' \nAPPLY_FULL: {}\n'.format(operation, 
                                              output_base_path,
                                              input_base_path,
                                              device,
                                              EXP_NAME, 
                                              APPLY_FULL)

filename = EXP_NAME + '.yaml'   
fp = open(os.path.join(input_base_path,'qblocks_configs/FULL/',filename),'w')
fp.write(config)
fp.close()
