# Supplementary material
Source: ML conference proceedings conference paper supplement (https://openaccess.thecvf.com/content/CVPR2021/html/Kryzhanovskiy_QPP_Real-Time_Quantization_CVPR_2021_paper.html)
Supplement: Supplementary file 1 [file Kryzhanovskiy_QPP_Real-Time_Quantization_CVPR_2021_supplemental.zip › 08893-supp/ResNet_supp_code/QPP_learn.ipynb]

# %% [code]
import torch
from torch import nn
import torch.nn.functional as F
import torchvision
from collections import OrderedDict
import numpy as np
import time
import os
import sys
import json
from matplotlib import pyplot as plt
import pandas as pd
import pickle
from sklearn.linear_model import LinearRegression
from sklearn.ensemble import RandomForestRegressor
from sklearn.svm import SVR
from sklearn.metrics import mean_squared_error
from sklearn.model_selection import train_test_split
from sklearn.preprocessing import StandardScaler

from sklearn.linear_model import Lasso
from matplotlib.ticker import FuncFormatter, MaxNLocator
import copy
RANDOM_STATE = 101
from sklearn.linear_model import Ridge
%matplotlib inline
import math
from os import listdir
from os.path import isfile, join
import os

# %% [code]
'DYNAMIC_9997_9997'
'QPP_0_0'
'statistics'

# %% [code]
source_path = '/home/balitskiy/projects/ResNet18_cl'
checkpoint_name = 'resnet34'
statistics_type = 'statistics'
statistics_type_2 = 'statistics'
statistics_type_3 = 'statistics'
input_base_path = os.path.join(source_path, checkpoint_name)
output_base_path = os.path.join(source_path, checkpoint_name)
statistics_path = 'statistics/' + statistics_type
statistics_path_2 = 'statistics/' + statistics_type_2
statistics_path_3 = 'statistics/' + statistics_type_3
if not os.path.exists(input_base_path):
    os.mkdir(input_base_path)
if not os.path.exists(output_base_path):
    os.mkdir(output_base_path)
    
    


# %% [code]
statistics_full_path =  join(output_base_path, statistics_path)
statistics_full_path_2 = join(output_base_path, statistics_path_2)
statistics_full_path_3 = join(output_base_path, statistics_path_3)
qblock_ids = [f[:-5] for f in listdir(statistics_full_path) if isfile(join(statistics_full_path, f))]
qblock_ids.sort(key=lambda x: os.path.getmtime(join(statistics_full_path, x + '.json')))

position_second_predictor = 15 


stats_dict = dict()


for index, qblock_id in enumerate(qblock_ids):
    if index < position_second_predictor:
        if ".npy" not in qblock_id:
            stats_dict[qblock_id] = dict()
            qblock_stats_json = os.path.join(statistics_full_path, qblock_id + '.json')
            print(qblock_id)
            with open(qblock_stats_json, 'r') as params_f:
                stats_dict[qblock_id]['self'] = json.load(params_f)
                for key in stats_dict[qblock_id]['self'].keys():
                    stats_dict[qblock_id]['self'][key] = stats_dict[qblock_id]['self'][key][:10000] 
    if index == position_second_predictor:
        print(index)
        if ".npy" not in qblock_id:
            stats_dict[qblock_id] = dict()
            qblock_stats_json = os.path.join(statistics_full_path_2, qblock_id + '.json')
            print(qblock_id)
            with open(qblock_stats_json, 'r') as params_f:
                stats_dict[qblock_id]['self'] = json.load(params_f)
                for key in stats_dict[qblock_id]['self'].keys():
                    stats_dict[qblock_id]['self'][key] = stats_dict[qblock_id]['self'][key][:10000]
                    
    if index > position_second_predictor:
        if ".npy" not in qblock_id:
            stats_dict[qblock_id] = dict()
            qblock_stats_json = os.path.join(statistics_full_path_3, qblock_id + '.json')
            print(qblock_id)
            with open(qblock_stats_json, 'r') as params_f:
                stats_dict[qblock_id]['self'] = json.load(params_f)
                for key in stats_dict[qblock_id]['self'].keys():
                    stats_dict[qblock_id]['self'][key] = stats_dict[qblock_id]['self'][key][:10000] 
    

  
    

# %% [code]
def show_all_layers(stats_dict, points_show_num=6400, layer_name = None, x_stat_name='mean', y_stat_name='max', 
                    marker_style='+', input_layer='input_qblock', show_consts=False):
    
    f, ax = plt.subplots(1, 4, figsize=(36,6))
    
    counter = -1
    for i,layer in enumerate(stats_dict.keys()):
        if i in layer_name:
            counter +=1

            x = np.array(stats_dict[input_layer]['self'][x_stat_name][:points_show_num])
            ax[counter].plot(x, 
                     stats_dict[layer]['self'][y_stat_name][:points_show_num] , 
                     marker_style);


#             plt.legend();
#             plt.title(layer)
            ax[counter].set_title(str(i) + " Layer", fontsize = 20)
            #plt.xlabel('0.999-quantile, input of second convolution' + '_' + x_stat_name)
            ax[counter].set_xlabel('0.999-quantile, input of ' + str(2) + ' convolution', fontsize = 20)
            ax[counter].set_ylabel('0.999-quantile', fontsize = 20)
    plt.savefig('999_3_34' , dpi=40,bbox_inches = 'tight' );  
    plt.show();
            
            

# %% [markdown]

# Statistics example

# %% [code]
points_show_num = 10000
x_stat_name = '999_UP_QUANTILE'
y_stat_name = '999_UP_QUANTILE'
marker_style = '+'
input_layer = 'layer1_bl1_first_layer_basic_block'
show_consts = True
layer_name = [3, 6, 12,36]
show_all_layers(stats_dict, points_show_num=points_show_num, layer_name = layer_name, x_stat_name=x_stat_name, y_stat_name=y_stat_name,
               marker_style=marker_style, input_layer=input_layer, show_consts=show_consts)


# %% [markdown]
# Create regressors multi - QPP 


# %% [markdown]
## Preparing Functions 

# %% [markdown]
### Fit regressors functions

# %% [code]
def make_dataset(stats_dict,  target_layer, input_layers, features, y_train_stat='max', test_size=0.2):
    X = None
    
    for idx, feature in enumerate(features):
        X_t = None
        for input_layer in input_layers:

            if X_t is None:
                X_t = np.array(stats_dict[input_layer]['self'][feature])[:, None]            
            else:
                X_t = np.concatenate((X_t, np.array(stats_dict[input_layer]['self'][feature])[:, None]), axis=1)
        if X is None:
            X = X_t
        else:
            X = np.concatenate((X,X_t),axis = 1)
    Y = np.array(stats_dict[target_layer]['self'][y_train_stat])
    X_train, X_test, y_train, y_test = train_test_split(X, Y, test_size=test_size, shuffle = False)
    scaler = StandardScaler()
    scaler.fit(X_train)
    X_train_scaled = scaler.transform(X_train)
    X_test_scaled = scaler.transform(X_test)
    return X_train, X_test, y_train, y_test, X_train_scaled, X_test_scaled, scaler


def fit_regressors(regressors_skeletons_dict, dataset):
    X_train, X_test, y_train, y_test, X_train_scaled, X_test_scaled, scaler = dataset
    regressors_dict = dict()
    for reg_name in regressors_skeletons_dict:
        regressor = regressors_skeletons_dict[reg_name]['class'](**regressors_skeletons_dict[reg_name]['params'])
        regressor.fit(X_train_scaled, y_train)
        regressors_dict[reg_name] = regressor
    return regressors_dict


def get_predictions(regressors_dict, dataset):
    X_train, X_test, y_train, y_test, X_train_scaled, X_test_scaled, scaler = dataset
    predictions_dict = dict()
    for reg_name in regressors_dict:
        regressor = regressors_dict[reg_name]
        predictions_dict[reg_name] = dict()
        predictions_dict[reg_name]['train'] = regressor.predict(X_train_scaled)
        predictions_dict[reg_name]['test'] = regressor.predict(X_test_scaled)
    return predictions_dict
        

def get_errors(regressors_dict, dataset, predictions_dict=None):
    X_train, X_test, y_train, y_test, X_train_scaled, X_test_scaled, scaler = dataset
    errors_dict = dict()
    if predictions_dict is None:
        predictions_dict = get_predictions(regressors_dict, dataset)
    for reg_name in regressors_dict:
        y_pred_train_scaled = predictions_dict[reg_name]['train']
        y_pred_test_scaled = predictions_dict[reg_name]['test']
        errors_dict[reg_name] = dict()
        errors_dict[reg_name]['Train abs error'] = np.abs(y_pred_train_scaled - y_train)
        errors_dict[reg_name]['Train rel error'] = np.abs(y_pred_train_scaled - y_train) / np.abs(y_train)
        errors_dict[reg_name]['Train mse error'] = np.power(y_train - y_pred_train_scaled,2) / np.power(y_train.mean(),2)
        errors_dict[reg_name]['Test abs error'] = np.abs(y_pred_test_scaled - y_test)
        errors_dict[reg_name]['Test rel error'] = np.abs(y_pred_test_scaled - y_test) / np.abs(y_test)
        errors_dict[reg_name]['Test mse error'] = np.power(y_test - y_pred_test_scaled,2)/ np.power(y_test.mean(),2)
    
    
    return errors_dict


def process_layer(stats_dict, target_layer, input_layer, features, regressors_skeletons_dict, 
                y_train_stat='max', test_size=0.2):
    
    if np.mean(stats_dict[target_layer]["self"][y_train_stat]) == 0:
        y_test_size = math.ceil(test_size * len(stats_dict[target_layer]['self'][y_train_stat]))
        y_train_size = math.floor((1 - test_size) * len(stats_dict[target_layer]['self'][y_train_stat]))
        stats_dict[target_layer]['dataset'] = [None] 
        stats_dict[target_layer]['regressors'] = dict()
        stats_dict[target_layer]['errors'] = dict()
        stats_dict[target_layer]['predictions'] = dict()
        for regressor in regressors_skeletons_dict.keys():
            stats_dict[target_layer]['regressors'][regressor] = None 
            stats_dict[target_layer]['errors'][regressor] = dict()
            
            stats_dict[target_layer]['errors'][regressor]['Train abs error'] = np.zeros(y_train_size)
            stats_dict[target_layer]['errors'][regressor]['Train rel error'] = np.zeros(y_train_size)
            stats_dict[target_layer]['errors'][regressor]['Train mse error'] = np.zeros(y_train_size)
            stats_dict[target_layer]['errors'][regressor]['Test abs error'] = np.zeros(y_test_size)
            stats_dict[target_layer]['errors'][regressor]['Test rel error'] = np.zeros(y_test_size)
            stats_dict[target_layer]['errors'][regressor]['Test mse error'] = np.zeros(y_test_size)
            
            stats_dict[target_layer]['predictions'][regressor] = dict()
            stats_dict[target_layer]['predictions'][regressor]['train'] = np.zeros(y_train_size) 
            stats_dict[target_layer]['predictions'][regressor]['test'] = np.zeros(y_test_size)
        
        return stats_dict
    
    stats_dict[target_layer]['dataset'] = make_dataset(stats_dict, target_layer, input_layer, features,
                                                y_train_stat=y_train_stat, test_size=test_size)
    
    stats_dict[target_layer]['regressors'] = fit_regressors(regressors_skeletons_dict, 
                                                     stats_dict[target_layer]['dataset'])
    
    stats_dict[target_layer]['predictions'] = get_predictions(stats_dict[target_layer]['regressors'], 
                                                       stats_dict[target_layer]['dataset'])
    
    stats_dict[target_layer]['errors'] = get_errors(stats_dict[target_layer]['regressors'], 
                                             stats_dict[target_layer]['dataset'], 
                                             stats_dict[target_layer]['predictions'])
    
    
    
    return stats_dict
    


# %% [code]
def create_predictors_skeleton(predictors): 
    all_regressors_skeletons_dict = {
                'Linear': {
                    'class': LinearRegression,
                    'params': {}
                },
                'Lasso':{
                    'class': Lasso,
                    'params': {
                        'alpha': 0.1,
                    }
                },

                'RF': {
                    'class': RandomForestRegressor,
                    'params': {
                        'n_estimators': 10,
                        'n_jobs': -1
                    }
                },
                'SVR': {
                    'class': SVR,
                    'params': {
                        'kernel': 'rbf'
                    }
                }
            }
    predictors_dict = dict()
    for predictor in predictors:
        predictors_dict[predictor] = all_regressors_skeletons_dict[predictor]
    return predictors_dict

# %% [markdown]
### Featires creation functions 

# %% [code]
def create_features(stats_dict, dropped_features):
    FEATURES = []
    features_stats_name = []
    for stat_name in stats_dict["prelayer_qblock_1"]["self"].keys():
        if stat_name in dropped_features:
            continue
        elif np.mean(stats_dict["prelayer_qblock_1"]["self"][stat_name]) == 0:
            continue
        else:
            if stat_name in ['MAX', 'MEAN', 'STD', 'MIN', 'ABS_MAX']:
                t_feature = stat_name
            else: 
                position = stat_name.find("_")
                if position == 1:
                    continue # just 1 quantile, so it is MAX
                else: 
                    if 'UP' in stat_name:
                        t_feature = float("0." + stat_name[: position])
                    if 'LOW' in stat_name:
                        t_feature = float("-0." + stat_name[: position])
                        
            FEATURES.append(t_feature)
            features_stats_name.append(stat_name)
            
            
    return FEATURES, features_stats_name

# %% [markdown]
### Mapping qpp to layers functions

# %% [code]
def map_inStats_tarStats(stats_dict, qpp_target_layers_seqs, qpp_layers): #assume that layers (keys of stats dict) are sorted from first to last
    mapping = dict()
    #detemine seqs of layer for each qpp
    collect_flag = 0
    for qpp_index, seqs in enumerate(qpp_target_layers_seqs):
        for layer in stats_dict.keys():
            if len(seqs) == 0:
                if layer == seqs[0]:
                    mapping[layer] = [qpp_layers[qpp_index]]
            else:
                if layer == seqs[0] and collect_flag == 0:
                    mapping[layer] = [qpp_layers[qpp_index]]
                    collect_flag = 1
                elif layer == seqs[1] and collect_flag == 1:
                    mapping[layer] = [qpp_layers[qpp_index]]
                    collect_flag = 0
                elif collect_flag == 1:
                     mapping[layer] = [qpp_layers[qpp_index]]

    return mapping
    


# %% [code]
### re do, all possible features in every branch


def map_inStats_tarStats_HRnet(stats_dict,qpp_layers):

    mapping = dict()
    quantiles = [0.99999,0.99996,0.99984,0.99936]
    mapping_quantiles = dict()
    counter  = 0
    t_qpp_layers = []
    counter = 0
    for layer in stats_dict.keys():

        if layer in qpp_layers:

            t_qpp_layers.append(qpp_layers[counter]) 
            counter += 1
        mapping[layer] = t_qpp_layers.copy()

        
    return mapping
        
        

# %% [markdown]
## Init Experiment

# %% [markdown]
### Init directories for predictors and results

# %% [code]

output_base_path = os.path.join(source_path, checkpoint_name)
ALL_UP_PREDICTORS_PATH = 'up_predictors/'+ 'statistics' + '/'
ALL_LOW_PREDICTORS_PATH = 'low_predictors/'+ 'statistics'+ '/'
QPP_ERROR_PLOTS_PATH = 'qpp_errors/'+ 'statistics' + '/'


up_predictors_dir_full = os.path.join(output_base_path, ALL_UP_PREDICTORS_PATH)
low_predictors_dir_full = os.path.join(output_base_path, ALL_LOW_PREDICTORS_PATH)
qpp_error_dir = os.path.join(output_base_path, QPP_ERROR_PLOTS_PATH) 

if not os.path.exists(os.path.join(up_predictors_dir_full)):
    os.mkdir(os.path.join(up_predictors_dir_full))

if not os.path.exists(os.path.join(low_predictors_dir_full)):
    os.mkdir(os.path.join(low_predictors_dir_full))
    
    
if not os.path.exists(os.path.join(qpp_error_dir)):
    os.mkdir(os.path.join(qpp_error_dir))


# %% [markdown]
### Init QPP positions

# %% [code]

experiments = dict()
experiments_params = dict()
stat_dicts_exp= dict()

# Second QPP experiment 
qpp_layers_4 = ['prelayer_qblock_1', 'layer3_bl0_first_layer_basic_block']
qpp_layers_1 =  ['prelayer_qblock_1']


experiments_params["1QPP_SB"] = [stats_dict,qpp_layers_1]
experiments_params["2QPP_SB"] = [stats_dict,qpp_layers_4]


experiments["2QPP_SB"] = map_inStats_tarStats_HRnet
experiments["1QPP_SB"] = map_inStats_tarStats_HRnet


# %% [markdown]
### Init Features


# %% [code]
target_features_UP = []
target_features_LOW = []
for stat_name in stats_dict["prelayer_qblock_1"]["self"].keys():
    if 'UP' in stat_name:
        target_features_UP.append(stat_name)
    if 'LOW' in stat_name: 
        target_features_LOW.append(stat_name)
# TARGET QUANTIZATION PARAMETERS         
target_features_UP = ["99_UP_QUANTILE"]
target_features_LOW = ["99_LOW_QUANTILE"]

# %% [code]
ALL_FEATURES, ALL_features_stats_name = create_features(stats_dict, [])
ALL_FEATURES, ALL_features_stats_name;


# %% [code]
# FEATURE space
FEATURES = [0.91, 0.99,0.999, 0.9997, 'MEAN', 'MAX']
features_stats_name = ['91_UP_QUANTILE','99_UP_QUANTILE','999_UP_QUANTILE','9997_UP_QUANTILE','MEAN', 'MAX']


# %% [markdown]
### Init regressors

# %% [code]
regressors_names = ["Linear"]
regressors_skeletons_dict = create_predictors_skeleton(regressors_names)

# %% [markdown]
## Learn Models 

# %% [markdown]
### UP QPP thresholds

# %% [code]


for target_feature in target_features_UP:
    for t_exp in experiments.keys():
        
        exp = target_feature[:target_feature.find("_")]+ "_UP" + "__" + t_exp  
        stat_dicts_exp[exp] = copy.deepcopy(stats_dict)

        for layer in stat_dicts_exp[exp].keys():
            if 'input' not in layer:


                target_layer = layer
                input_layer = experiments[t_exp](*experiments_params[t_exp])[layer]
                test_size = 0.5

                stat_dicts_exp[exp] = process_layer(stat_dicts_exp[exp], target_layer, input_layer, features_stats_name, regressors_skeletons_dict, test_size=test_size,
                                    y_train_stat=target_feature)


                for regressor_name in stat_dicts_exp[exp][target_layer]['regressors'].keys():
                    
                    path_to_predictors = os.path.join(up_predictors_dir_full,   exp + "_" + regressor_name)
                    if not os.path.exists(path_to_predictors):
                        os.mkdir(path_to_predictors)
                                            
                    filename_predictor = os.path.join(path_to_predictors, "predictor_" + target_layer + '.sav')
                    with open(filename_predictor, 'wb') as fp:
                        pickle.dump(stat_dicts_exp[exp][target_layer]['regressors'][regressor_name], fp)

                    filename_scaler = os.path.join(path_to_predictors, "scaler_" + target_layer + '.sav')
                    with open(filename_scaler, 'wb') as fp:
                        pickle.dump(stat_dicts_exp[exp][layer]['dataset'][-1], fp)
                    
        for regressor_name in stat_dicts_exp[exp][target_layer]['regressors'].keys():   
            path_to_predictors = os.path.join(up_predictors_dir_full,  exp + "_" + regressor_name)
            filename_set_up = os.path.join(path_to_predictors, "QPP_setup.json")
            dict_setup = {"EXP_NAME" : exp,
                         "FEATURES" : FEATURES,
                         "QPP_POSITIONS" :  experiments_params[t_exp][1]}
            print(dict_setup)

            with open(filename_set_up, 'w') as file:
                json.dump(dict_setup, file)

            
            

    

# %% [markdown]
### Low threshold QPP

# %% [code]
for target_feature in target_features_LOW:
    for t_exp in experiments.keys():
        
        exp = target_feature[:target_feature.find("_")]+ "_LOW" + "__" + t_exp    
        stat_dicts_exp[exp] = copy.deepcopy(stats_dict)

        for layer in stat_dicts_exp[exp].keys():
            if 'input' not in layer:
#                 print(layer, exp)


                target_layer = layer
                input_layer = experiments[t_exp](*experiments_params[t_exp])[layer]
                test_size = 0.5

                stat_dicts_exp[exp] = process_layer(stat_dicts_exp[exp], target_layer, input_layer, features_stats_name, regressors_skeletons_dict, test_size=test_size,
                                    y_train_stat=target_feature)


                for regressor_name in stat_dicts_exp[exp][target_layer]['regressors'].keys():
                    
                    path_to_predictors = os.path.join(low_predictors_dir_full,   exp + "_" + regressor_name  )
                    if not os.path.exists(path_to_predictors):
                        os.mkdir(path_to_predictors)
                                            
                    filename_predictor = os.path.join(path_to_predictors, "predictor_" + target_layer + '.sav')
                    with open(filename_predictor, 'wb') as fp:
                        pickle.dump(stat_dicts_exp[exp][target_layer]['regressors'][regressor_name], fp)

                    filename_scaler = os.path.join(path_to_predictors, "scaler_" + target_layer + '.sav')
                    with open(filename_scaler, 'wb') as fp:
                        print(stat_dicts_exp[exp][layer]['dataset'][-1])
                        pickle.dump(stat_dicts_exp[exp][layer]['dataset'][-1], fp)
        
        for regressor_name in stat_dicts_exp[exp][target_layer]['regressors'].keys():   
            path_to_predictors = os.path.join(low_predictors_dir_full,  exp + "_" + regressor_name)
            filename_set_up = os.path.join(path_to_predictors, "QPP_setup.json")
            dict_setup = {"EXP_NAME" : exp,
                         "FEATURES" : FEATURES,
                         "QPP_POSITIONS" :  experiments_params[t_exp][1]}
            print(dict_setup)

            with open(filename_set_up, 'w') as file:
                json.dump(dict_setup, file)
        
    

# %% [code]
which = 'mse'
errors_list = []
stds_list = []
regressor_s = regressors_names

errors_exps = dict()
stds_exps = dict()
for exp in stat_dicts_exp.keys():
    errors_exps[exp] = dict()
    stds_exps[exp] = dict()
    for regr in regressor_s:
        errors_exps[exp][regr] = []
        stds_exps[exp][regr] = []

        for index,layer in enumerate(stat_dicts_exp[exp].keys()):
            if 'input' not in layer:
                errors_dict = stat_dicts_exp[exp][layer]['errors'][regr]


                rel_error = (errors_dict['Test {} error'.format(which)]).mean() * 100
               
                std = errors_dict['Test {} error'.format(which)].std() * 100

                errors_exps[exp][regr].append(rel_error)
                stds_exps[exp][regr].append(std)
        errors_exps[exp][regr] = np.array(errors_exps[exp][regr])
        stds_exps[exp][regr] = np.array(stds_exps[exp][regr])
        
        
for exp in stat_dicts_exp.keys():   
    print(exp)
    errors_exps[exp]["mean"] = []
    stds_exps[exp]["mean"] = []
    y_train_stat = target_features_UP[0] 
    for index,layer in enumerate(stat_dicts_exp[exp].keys()):
        if 'input' not in layer:
            if stat_dicts_exp[exp][layer]['dataset'][0] is not None:
               
                target_values = stat_dicts_exp[exp][layer]['dataset'][3]
                mean_value = target_values.mean()
                rel_errors = np.power(np.abs(target_values - mean_value),2) / \
                np.power(stat_dicts_exp[exp][layer]['dataset'][3].mean(),2) * 100
                
            else:
                rel_errors = np.zeros(target_values.shape)
            errors_exps[exp]["mean"].append(rel_errors.mean()) 
            stds_exps[exp]["mean"].append(rel_errors.std())

    stds_exps[exp]["mean"] = np.array(stds_exps[exp]["mean"])
    errors_exps[exp]["mean"] = np.array(errors_exps[exp]["mean"])
     
        

# %% [code]
exp_names = list(stat_dicts_exp.keys())
print(exp_names)

x = np.arange(errors_exps[exp][regr].shape[0])

exp = exp_names[1]
for index_exp, exp in enumerate(exp_names):
    for index, regr in enumerate(regressor_s):
        fig = plt.figure(figsize=(13,8))
        plt.plot(x, errors_exps[exp][regr], color='C'+str(index), label= regr)
        plt.fill_between(x, errors_exps[exp][regr] + stds_exps[exp][regr], stds_exps[exp][regr] - stds_exps[exp][regr],
                        color='C'+str(index), alpha=0.1)
        
        plt.plot(x, errors_exps[exp]["mean"], color='C3', label= "mean" )
        plt.fill_between(x, errors_exps[exp]["mean"] + stds_exps[exp]["mean"], stds_exps[exp]["mean"] - stds_exps[exp]["mean"],
                        color='C3', alpha=0.1)
        
        plt.xlabel('Layers', fontsize = 16)
        plt.ylabel('Mean Error, %', fontsize = 16)
        plt.title(exp + "_" + regr, fontsize = 20)
        plt.ylim(0,10)
        plt.xlim(-1,errors_exps[exp][regr].shape[0])
        plt.grid()
        plt.legend(fontsize = 17)
        plt.savefig(os.path.join(qpp_error_dir, exp + '.png'), dpi = 200)
        plt.show()
        
