# Supplementary material
Source: ML conference proceedings conference paper supplement (https://openaccess.thecvf.com/content/CVPR2021/html/Kryzhanovskiy_QPP_Real-Time_Quantization_CVPR_2021_paper.html)
Supplement: Supplementary file 1 [file Kryzhanovskiy_QPP_Real-Time_Quantization_CVPR_2021_supplemental.zip › 08893-supp/ResNet_supp_code/resnet18/COLLECT_STATISTICS.yaml]

OPERATION:
  - 'collect_statistics'
EXP_NAMES:
  - 'COLLECT_STATISTICS'
NN_TYPE: 'resnet18'
SOURCE: '*your ssource path*/'
OUTPUT_BASE_PATH: '*your ssource path*/resnet18'
INPUT_BASE_PATH: '*your ssource path*/resnet18'
LOG: 'log/'
QB_CONFIGS:
  - 'qblocks_configs/COLLECT/COLLECT.yaml'
CHECKPOINTS:
  - 'checkpoints/initial_resnet18.pth'
DEVICES:
  - 0
DATASET_TYPE: imagenet
TRAIN_DATA: ''
TEST_DATA: ''
WEIGHT:
  NUM_BITS:
    - 32
  Q_ALGORITHM: 
    - 'asymmetric'
VALIDATE:
  BATCH_SIZE_PER_GPU: 300
