# Supplementary material
Source: ML conference proceedings conference paper supplement (https://openaccess.thecvf.com/content/CVPR2021/html/Kryzhanovskiy_QPP_Real-Time_Quantization_CVPR_2021_paper.html)
Supplement: Supplementary file 1 [file Kryzhanovskiy_QPP_Real-Time_Quantization_CVPR_2021_supplemental.zip › 08893-supp/ResNet_supp_code/resnet18/README]

Start experiment: 
0) Download ResNet18 checkpoint and name it initial_checkpoint.pth
1) Create quantization block configs via create_configs.ipynb
2) Start /Scripts/COLLECT_STATISTICS.sh -- thresholds for STATIC and STATISTICS for QPP training collection 
3) Set up VALIDATE_*quantization type*.yaml config. (choose bit-width, paths , etc)
4) Start /Scripts/VALIDATE_*type of quantization* 
