# Supplementary material
Source: ML conference proceedings conference paper supplement (https://openaccess.thecvf.com/content/CVPR2021/html/Kryzhanovskiy_QPP_Real-Time_Quantization_CVPR_2021_paper.html)
Supplement: Supplementary file 1 [file Kryzhanovskiy_QPP_Real-Time_Quantization_CVPR_2021_supplemental.zip › 08893-supp/ResNet_supp_code/resnet18/Scripts/COLLECT_STATISTICS.sh]

CUDA_VISIBLE_DEVICES=1 python3 *your ssource path*/src/q_test.py \
                    --cfg-exp *your ssource path*/resnet18/COLLECT_STATISTICS.yaml 
				
