# Supplementary material
Source: ML conference proceedings conference paper supplement (https://openaccess.thecvf.com/content/CVPR2021/html/Kryzhanovskiy_QPP_Real-Time_Quantization_CVPR_2021_paper.html)
Supplement: Supplementary file 1 [file Kryzhanovskiy_QPP_Real-Time_Quantization_CVPR_2021_supplemental.zip › 08893-supp/ResNet_supp_code/resnet18/VALIDATE_ALL.yaml]

OPERATION:
  - 'validate' 
  - 'validate' 
  - 'validate' 
EXP_NAMES: 
  - 'full_exps' 
  - 'full_exps' 
  - 'full_exps' 
NN_TYPE: 'resnet18' 
SOURCE: '/home/balitskiy/projects/ResNet18_cl'
OUTPUT_BASE_PATH: '/home/balitskiy/projects/ResNet18_cl/resnet18'
INPUT_BASE_PATH: '/home/balitskiy/projects/ResNet18_cl/resnet18'
LOG: 'log/' 
DENSE_SPARSE: 
  - false 
  - false 
  - false 
ACT_NUM_BITS: 
  - 4 
  - 4 
  - 4 
QB_CONFIGS: 
  - 'qblocks_configs/DYNAMIC/DYNAMIC_9997_9997.yaml' 
  - 'qblocks_configs/STATIC/STATIC_9997_9997.yaml' 
  - 'qblocks_configs/QPP/QPP_9997_UP__1QPP_SB_Linear_9997_LOW__1QPP_SB_Linear.yaml' 
CHECKPOINTS: 
  - 'checkpoints/initial_resnet18.pth' 
  - 'checkpoints/initial_resnet18.pth' 
  - 'checkpoints/initial_resnet18.pth' 
DEVICES: 
  - 0 
  - 0 
  - 0 
DATASET_TYPE: imagenet 
TRAIN_DATA: '/home/kozyrskiy/global_data/Imagenet-12/train' 
TEST_DATA: '/home/kozyrskiy/global_data/Imagenet-12/val' 
WEIGHT: 
  NUM_BITS: 
    - 8 
    - 8 
    - 8 
  Q_ALGORITHM: 
    - 'asymmetric' 
    - 'asymmetric' 
    - 'asymmetric' 
VALIDATE:
  SAVE_IMAGE_PATH: 
    - 'images' 
    - 'images' 
    - 'images' 
  BATCH_SIZE_PER_GPU: 200 
