# Supplementary material
Source: ML conference proceedings conference paper supplement (https://openaccess.thecvf.com/content/CVPR2021/html/Kryzhanovskiy_QPP_Real-Time_Quantization_CVPR_2021_paper.html)
Supplement: Supplementary file 1 [file Kryzhanovskiy_QPP_Real-Time_Quantization_CVPR_2021_supplemental.zip › 08893-supp/ResNet_supp_code/resnet18/VALIDATE_DEN_SP.yaml]

OPERATION:
  - 'validate'
  - 'validate'
  - 'validate'
  - 'validate'
  - 'validate'
  - 'validate'
  - 'validate'
  - 'validate'
  - 'validate'
  - 'validate'
  - 'validate'
  - 'validate'
EXP_NAMES:
  - 'VALIDATE_QPP_4_4'
  - 'VALIDATE_QPP_1_1'
  - 'VALIDATE_QPP_4_4'
  - 'VALIDATE_QPP_4_4'
  - 'VALIDATE_QPP_1_1'
  - 'VALIDATE_QPP_4_4'
  - 'VALIDATE_QPP_4_4'
  - 'VALIDATE_QPP_1_1'
  - 'VALIDATE_QPP_4_4'
  - 'VALIDATE_QPP_4_4'
  - 'VALIDATE_QPP_1_1'
  - 'VALIDATE_QPP_4_4'
  
  
NN_TYPE: 'resnet18'
SOURCE: '*your ssource path*'
OUTPUT_BASE_PATH: '*your ssource path*/resnet18'
INPUT_BASE_PATH: '*your ssource path*/resnet18'
LOG: 'log/'
ACT_NUM_BITS: 
  - 4
  - 4
  - 4
  - 4
  - 4
  - 4
  - 4
  - 4
  - 4
  - 4
  - 4
  - 4


DENSE_SPARSE:
  - true
  - true
  - true
  - true
  - true
  - true
  - true
  - true
  - true
  - true
  - true
  - true


QB_CONFIGS:
  - 'qblocks_configs/DYNAMIC/DYNAMIC_95_95.yaml'
  - 'qblocks_configs/DYNAMIC/DYNAMIC_955_955.yaml'
  - 'qblocks_configs/DYNAMIC/DYNAMIC_96_96.yaml'
  - 'qblocks_configs/DYNAMIC/DYNAMIC_965_965.yaml'
  - 'qblocks_configs/DYNAMIC/DYNAMIC_97_97.yaml'
  - 'qblocks_configs/DYNAMIC/DYNAMIC_975_975.yaml'
  - 'qblocks_configs/DYNAMIC/DYNAMIC_98_98.yaml'
  - 'qblocks_configs/DYNAMIC/DYNAMIC_985_985.yaml'
  - 'qblocks_configs/DYNAMIC/DYNAMIC_99_99.yaml'
  - 'qblocks_configs/DYNAMIC/DYNAMIC_995_995.yaml'
  - 'qblocks_configs/DYNAMIC/DYNAMIC_999_999.yaml'
  - 'qblocks_configs/DYNAMIC/DYNAMIC_9995_9995.yaml'
 

CHECKPOINTS:
  - 'checkpoints/initial_resnet18.pth'
  - 'checkpoints/initial_resnet18.pth'
  - 'checkpoints/initial_resnet18.pth'
  - 'checkpoints/initial_resnet18.pth'
  - 'checkpoints/initial_resnet18.pth'
  - 'checkpoints/initial_resnet18.pth'
  - 'checkpoints/initial_resnet18.pth'
  - 'checkpoints/initial_resnet18.pth'
  - 'checkpoints/initial_resnet18.pth'
  - 'checkpoints/initial_resnet18.pth'
  - 'checkpoints/initial_resnet18.pth'
  - 'checkpoints/initial_resnet18.pth'

DEVICES:
  - 0
  - 0
  - 0
  - 0
  - 0
  - 0
  - 0
  - 0
  - 0
  - 0
  - 0
  - 0


DATASET_TYPE: imagenet
TRAIN_DATA: ''
TEST_DATA: ''
WEIGHT:
  NUM_BITS:
    - 8
    - 8
    - 8
    - 8
    - 8
    - 8
    - 8
    - 8
    - 8
    - 8
    - 8
    - 8

  Q_ALGORITHM: 
    - 'asymmetric'
    - 'asymmetric'
    - 'asymmetric'
    - 'asymmetric'
    - 'asymmetric'
    - 'asymmetric'
    - 'asymmetric'
    - 'asymmetric'
    - 'asymmetric'
    - 'asymmetric'
    - 'asymmetric'
    - 'asymmetric'


VALIDATE:
  SAVE_IMAGE_PATH:
    - 'images/'
    - 'images/'
    - 'images/'
    - 'images/'
    - 'images/'
    - 'images/'
    - 'images/'
    - 'images/'
    - 'images/'
    - 'images/'
    - 'images/'
    - 'images/'
    
    
  BATCH_SIZE_PER_GPU: 200
