# Supplementary material
Source: ML conference proceedings conference paper supplement (https://openaccess.thecvf.com/content/CVPR2021/html/Kryzhanovskiy_QPP_Real-Time_Quantization_CVPR_2021_paper.html)
Supplement: Supplementary file 1 [file Kryzhanovskiy_QPP_Real-Time_Quantization_CVPR_2021_supplemental.zip › 08893-supp/ResNet_supp_code/resnet18/VALIDATE_DYNAMIC.yaml]

OPERATION:
  - 'validate'
  - 'validate'
  - 'validate'
  - 'validate'
  - 'validate'
  - 'validate'
  - 'validate'
  - 'validate'
  - 'validate'
  - 'validate'
  - 'validate'
  - 'validate'
  - 'validate'
  - 'validate'
  - 'validate'
  - 'validate'
EXP_NAMES:
  - 'VALIDATE_DYNAMIC_0_0'
  - 'VALIDATE_DYNAMIC_999_999'
  - 'VALIDATE_DYNAMIC_9993_9993'
  - 'VALIDATE_DYNAMIC_9995_9995'
  - 'VALIDATE_DYNAMIC_9997_9997'
  - 'VALIDATE_DYNAMIC_9999_9999'
  - 'VALIDATE_DYNAMIC_99995_99995'
  - 'VALIDATE_DYNAMIC_99999_99999'
  - 'VALIDATE_DYNAMIC_0_0'
  - 'VALIDATE_DYNAMIC_999_999'
  - 'VALIDATE_DYNAMIC_9993_9993'
  - 'VALIDATE_DYNAMIC_9995_9995'
  - 'VALIDATE_DYNAMIC_9997_9997'
  - 'VALIDATE_DYNAMIC_9999_9999'
  - 'VALIDATE_DYNAMIC_99995_99995'
  - 'VALIDATE_DYNAMIC_99999_99999'
NN_TYPE: 'resnet18'
SOURCE: '*your ssource path*'
OUTPUT_BASE_PATH: '*your ssource path*/resnet18'
INPUT_BASE_PATH: '*your ssource path*/resnet18'
LOG: 'log/'
DENSE_SPARSE:
    - false
    - false
    - false
    - false
    - false
    - false
    - false
    - false
    - false
    - false
    - false
    - false
    - false
    - false
    - false
    - false
ACT_NUM_BITS: 
  - 8
  - 8
  - 8
  - 8
  - 8
  - 8
  - 8
  - 8
  - 8
  - 8
  - 8
  - 8
  - 8
  - 8
  - 8
  - 8
QB_CONFIGS:
  - 'qblocks_configs/DYNAMIC/DYNAMIC_9999_9999.yaml'
  - 'qblocks_configs/DYNAMIC/DYNAMIC_99991_99991.yaml'
  - 'qblocks_configs/DYNAMIC/DYNAMIC_99992_99992.yaml'
  - 'qblocks_configs/DYNAMIC/DYNAMIC_99993_99993.yaml'
  - 'qblocks_configs/DYNAMIC/DYNAMIC_99994_99994.yaml'
  - 'qblocks_configs/DYNAMIC/DYNAMIC_99995_99995.yaml'
  - 'qblocks_configs/DYNAMIC/DYNAMIC_99996_99996.yaml'
  - 'qblocks_configs/DYNAMIC/DYNAMIC_99997_99997.yaml'
  - 'qblocks_configs/DYNAMIC/DYNAMIC_99998_99998.yaml'
  - 'qblocks_configs/DYNAMIC/DYNAMIC_99999_99999.yaml'
  - 'qblocks_configs/DYNAMIC/DYNAMIC_998_998.yaml'
  - 'qblocks_configs/DYNAMIC/DYNAMIC_9982_9982.yaml'
  - 'qblocks_configs/DYNAMIC/DYNAMIC_9984_9984.yaml'
  - 'qblocks_configs/DYNAMIC/DYNAMIC_9986_9986.yaml'
  - 'qblocks_configs/DYNAMIC/DYNAMIC_9988_9988.yaml'
  - 'qblocks_configs/DYNAMIC/DYNAMIC_0_0.yaml'

CHECKPOINTS:
  - 'checkpoints/initial_resnet18.pth'
  - 'checkpoints/initial_resnet18.pth'
  - 'checkpoints/initial_resnet18.pth'
  - 'checkpoints/initial_resnet18.pth'
  - 'checkpoints/initial_resnet18.pth'
  - 'checkpoints/initial_resnet18.pth'
  - 'checkpoints/initial_resnet18.pth'
  - 'checkpoints/initial_resnet18.pth'
  - 'checkpoints/initial_resnet18.pth'
  - 'checkpoints/initial_resnet18.pth'
  - 'checkpoints/initial_resnet18.pth'
  - 'checkpoints/initial_resnet18.pth'
  - 'checkpoints/initial_resnet18.pth'
  - 'checkpoints/initial_resnet18.pth'
  - 'checkpoints/initial_resnet18.pth'
  - 'checkpoints/initial_resnet18.pth'

DEVICES:
  - 0
  - 0
  - 0
  - 0
  - 0
  - 0
  - 0
  - 0
  - 0
  - 0
  - 0
  - 0
  - 0
  - 0
  - 0
  - 0
DATASET_TYPE: imagenet
TRAIN_DATA: ''
TEST_DATA: ''
WEIGHT:
  NUM_BITS:
    - 8
    - 8
    - 8
    - 8
    - 8
    - 8
    - 8
    - 8
    - 8
    - 8
    - 8
    - 8
    - 8
    - 8
    - 8
    - 8
  Q_ALGORITHM: 
    - 'asymmetric'
    - 'asymmetric'
    - 'asymmetric'
    - 'asymmetric'
    - 'asymmetric'
    - 'asymmetric'
    - 'asymmetric'
    - 'asymmetric'
    - 'asymmetric'
    - 'asymmetric'
    - 'asymmetric'
    - 'asymmetric'
    - 'asymmetric'
    - 'asymmetric'
    - 'asymmetric'
    - 'asymmetric'

VALIDATE:
  SAVE_IMAGE_PATH:
    - 'images/'
    - 'images/'
    - 'images/'
    - 'images/'
    - 'images/'
    - 'images/'
    - 'images/'
    - 'images/'
    - 'images/'
    - 'images/'
    - 'images/'
    - 'images/'
    - 'images/'
    - 'images/'
    - 'images/'
    - 'images/'
  BATCH_SIZE_PER_GPU: 200
