# Supplementary material
Source: ML conference proceedings conference paper supplement (https://openaccess.thecvf.com/content/CVPR2021/html/Kryzhanovskiy_QPP_Real-Time_Quantization_CVPR_2021_paper.html)
Supplement: Supplementary file 1 [file Kryzhanovskiy_QPP_Real-Time_Quantization_CVPR_2021_supplemental.zip › 08893-supp/ResNet_supp_code/resnet18/VALIDATE_QPP.yaml]

OPERATION:
  - 'validate'
  - 'validate'
  - 'validate'
  - 'validate'
  - 'validate'
  - 'validate'
  - 'validate'
  - 'validate'
  - 'validate'
  - 'validate'
  - 'validate'

EXP_NAMES:
  - 'VALIDATE_QPP_4_4'
  - 'VALIDATE_QPP_1_1'
  - 'VALIDATE_QPP_4_4'
  - 'VALIDATE_QPP_1_1'
  - 'VALIDATE_QPP_1_1'
  - 'VALIDATE_QPP_1_1'
  - 'VALIDATE_QPP_1_1'
  - 'VALIDATE_QPP_1_1'
  - 'VALIDATE_QPP_1_1'
  - 'VALIDATE_QPP_1_1'
  - 'VALIDATE_QPP_1_1'
  
NN_TYPE: 'resnet18'
SOURCE: '*your ssource path*/'
OUTPUT_BASE_PATH: '*your ssource path*/resnet18'
INPUT_BASE_PATH: '*your ssource path*/resnet18'
LOG: 'log/'
ACT_NUM_BITS: 
  - 4
  - 4
  - 4
  - 4
  - 4
  - 4
  - 4
  - 4
  - 4
  - 4
  - 4

DENSE_SPARSE:
    - false
    - false
    - false
    - false
    - false
    - false
    - false
    - false
    - false
    - false
    - false

    


QB_CONFIGS:
  - 'qblocks_configs/QPP/QPP_999_UP__1QPP_SB_Linear_999_LOW__1QPP_SB_Linear.yaml'
  - 'qblocks_configs/QPP/QPP_9991_UP__1QPP_SB_Linear_9991_LOW__1QPP_SB_Linear.yaml'
  - 'qblocks_configs/QPP/QPP_9992_UP__1QPP_SB_Linear_9992_LOW__1QPP_SB_Linear.yaml'
  - 'qblocks_configs/QPP/QPP_9993_UP__1QPP_SB_Linear_9993_LOW__1QPP_SB_Linear.yaml'
  - 'qblocks_configs/QPP/QPP_9994_UP__1QPP_SB_Linear_9994_LOW__1QPP_SB_Linear.yaml'
  - 'qblocks_configs/QPP/QPP_9995_UP__1QPP_SB_Linear_9995_LOW__1QPP_SB_Linear.yaml'
  - 'qblocks_configs/QPP/QPP_9996_UP__1QPP_SB_Linear_9996_LOW__1QPP_SB_Linear.yaml'
  - 'qblocks_configs/QPP/QPP_9997_UP__1QPP_SB_Linear_9997_LOW__1QPP_SB_Linear.yaml'
  - 'qblocks_configs/QPP/QPP_9998_UP__1QPP_SB_Linear_9998_LOW__1QPP_SB_Linear.yaml'
  - 'qblocks_configs/QPP/QPP_9999_UP__1QPP_SB_Linear_9999_LOW__1QPP_SB_Linear.yaml'
  - 'qblocks_configs/QPP/QPP_998_UP__1QPP_SB_Linear_998_LOW__1QPP_SB_Linear.yaml'

  
  


CHECKPOINTS:
  - 'checkpoints/initial_resnet18.pth'
  - 'checkpoints/initial_resnet18.pth'
  - 'checkpoints/initial_resnet18.pth'
  - 'checkpoints/initial_resnet18.pth'
  - 'checkpoints/initial_resnet18.pth'
  - 'checkpoints/initial_resnet18.pth'
  - 'checkpoints/initial_resnet18.pth'
  - 'checkpoints/initial_resnet18.pth'
  - 'checkpoints/initial_resnet18.pth'
  - 'checkpoints/initial_resnet18.pth'
  - 'checkpoints/initial_resnet18.pth'


DEVICES:
  - 0
  - 0
  - 0
  - 0
  - 0
  - 0
  - 0
  - 0
  - 0
  - 0
  - 0

DATASET_TYPE: imagenet
TRAIN_DATA: ''
TEST_DATA: ''
WEIGHT:
  NUM_BITS:
    - 8
    - 8
    - 8
    - 8
    - 8
    - 8
    - 8
    - 8
    - 8
    - 8
    - 8

  Q_ALGORITHM: 
    - 'asymmetric'
    - 'asymmetric'
    - 'asymmetric'
    - 'asymmetric'
    - 'asymmetric'
    - 'asymmetric'
    - 'asymmetric'
    - 'asymmetric'
    - 'asymmetric'
    - 'asymmetric'
    - 'asymmetric'


VALIDATE:
  SAVE_IMAGE_PATH:
    - 'images/'
    - 'images/'
    - 'images/'
    - 'images/'
    - 'images/'
    - 'images/'
    - 'images/'
    - 'images/'
    - 'images/'
    - 'images/'
    - 'images/'


  BATCH_SIZE_PER_GPU: 200
