# Supplementary material
Source: ML conference proceedings conference paper supplement (https://openaccess.thecvf.com/content/CVPR2021/html/Kryzhanovskiy_QPP_Real-Time_Quantization_CVPR_2021_paper.html)
Supplement: Supplementary file 1 [file Kryzhanovskiy_QPP_Real-Time_Quantization_CVPR_2021_supplemental.zip › 08893-supp/ResNet_supp_code/resnet18/VALIDATE_STATIC.yaml]

OPERATION:
  - 'validate'
  - 'validate'
  - 'validate'
  - 'validate'
  - 'validate'
  - 'validate'
  - 'validate'
  - 'validate'
  - 'validate'
  - 'validate'
  - 'validate'


EXP_NAMES:
  - 'VALIDATE_DYNAMIC_0_0'
  - 'VALIDATE_DYNAMIC_999_999'
  - 'VALIDATE_DYNAMIC_9993_9993'
  - 'VALIDATE_DYNAMIC_9995_9995'
  - 'VALIDATE_DYNAMIC_9997_9997'
  - 'VALIDATE_DYNAMIC_9999_9999'
  - 'VALIDATE_DYNAMIC_99995_99995'
  - 'VALIDATE_DYNAMIC_99999_99999'
  - 'VALIDATE_DYNAMIC_0_0'
  - 'VALIDATE_DYNAMIC_999_999'
  - 'VALIDATE_DYNAMIC_9993_9993'


NN_TYPE: 'resnet18'
SOURCE: '*your ssource path*/'
OUTPUT_BASE_PATH: '*your ssource path*/resnet18'
INPUT_BASE_PATH: '*your ssource path*/resnet18'
LOG: 'log/'
DENSE_SPARSE:
    - false
    - false
    - false
    - false
    - false
    - false
    - false
    - false
    - false
    - false
    - false


ACT_NUM_BITS: 
  - 4
  - 4
  - 4
  - 4
  - 4
  - 4
  - 4
  - 4
  - 4
  - 4
  - 4


QB_CONFIGS:
  - 'qblocks_configs/STATIC/STATIC_999_999.yaml'
  - 'qblocks_configs/STATIC/STATIC_9991_9991.yaml'
  - 'qblocks_configs/STATIC/STATIC_9992_9992.yaml'
  - 'qblocks_configs/STATIC/STATIC_9993_9993.yaml'
  - 'qblocks_configs/STATIC/STATIC_9994_9994.yaml'
  - 'qblocks_configs/STATIC/STATIC_9995_9995.yaml'
  - 'qblocks_configs/STATIC/STATIC_9996_9996.yaml'
  - 'qblocks_configs/STATIC/STATIC_9997_9997.yaml'
  - 'qblocks_configs/STATIC/STATIC_9998_9998.yaml'
  - 'qblocks_configs/STATIC/STATIC_9999_9999.yaml'
  - 'qblocks_configs/STATIC/STATIC_998_998.yaml'

CHECKPOINTS:
  - 'checkpoints/initial_resnet18.pth'
  - 'checkpoints/initial_resnet18.pth'
  - 'checkpoints/initial_resnet18.pth'
  - 'checkpoints/initial_resnet18.pth'
  - 'checkpoints/initial_resnet18.pth'
  - 'checkpoints/initial_resnet18.pth'
  - 'checkpoints/initial_resnet18.pth'
  - 'checkpoints/initial_resnet18.pth'
  - 'checkpoints/initial_resnet18.pth'
  - 'checkpoints/initial_resnet18.pth'
  - 'checkpoints/initial_resnet18.pth'


DEVICES:
  - 0
  - 0
  - 0
  - 0
  - 0
  - 0
  - 0
  - 0
  - 0
  - 0
  - 0


DATASET_TYPE: imagenet
TRAIN_DATA: ''
TEST_DATA: ''
WEIGHT:
  NUM_BITS:
    - 8
    - 8
    - 8
    - 8
    - 8
    - 8
    - 8
    - 8
    - 8
    - 8
    - 8

  Q_ALGORITHM: 
    - 'asymmetric'
    - 'asymmetric'
    - 'asymmetric'
    - 'asymmetric'
    - 'asymmetric'
    - 'asymmetric'
    - 'asymmetric'
    - 'asymmetric'
    - 'asymmetric'
    - 'asymmetric'
    - 'asymmetric'


VALIDATE:
  SAVE_IMAGE_PATH:
    - 'images/'
    - 'images/'
    - 'images/'
    - 'images/'
    - 'images/'
    - 'images/'
    - 'images/'
    - 'images/'
    - 'images/'
    - 'images/'
    - 'images/'


  BATCH_SIZE_PER_GPU: 200
